# Supplementary material
Source: PubMed Central journal article supplement (PMC4336846)
Supplement: NIHMS632144-supplement-Supplementar_Figures.pdf [file NIHMS632144-supplement-Supplementar_Figures.pdf]

**ADVANCED  
HEALTHCARE  
MATERIALS**

Supporting Information

for *Adv. Healthcare Mater.*, DOI: 10.1002/adhm.201400336

Monocyte-Targeting Supramolecular Micellar Assemblies: A  
Molecular Diagnostic Tool for Atherosclerosis

*Eun Ji Chung, Laurie B. Mlinar, Kathryn Nord, Matthew J.  
Sugimoto, Emily Wonder, Francis J. Alenghat, Yun Fang, and  
Matthew Tirrell\**

## Supplemental Figures and Figure Legends

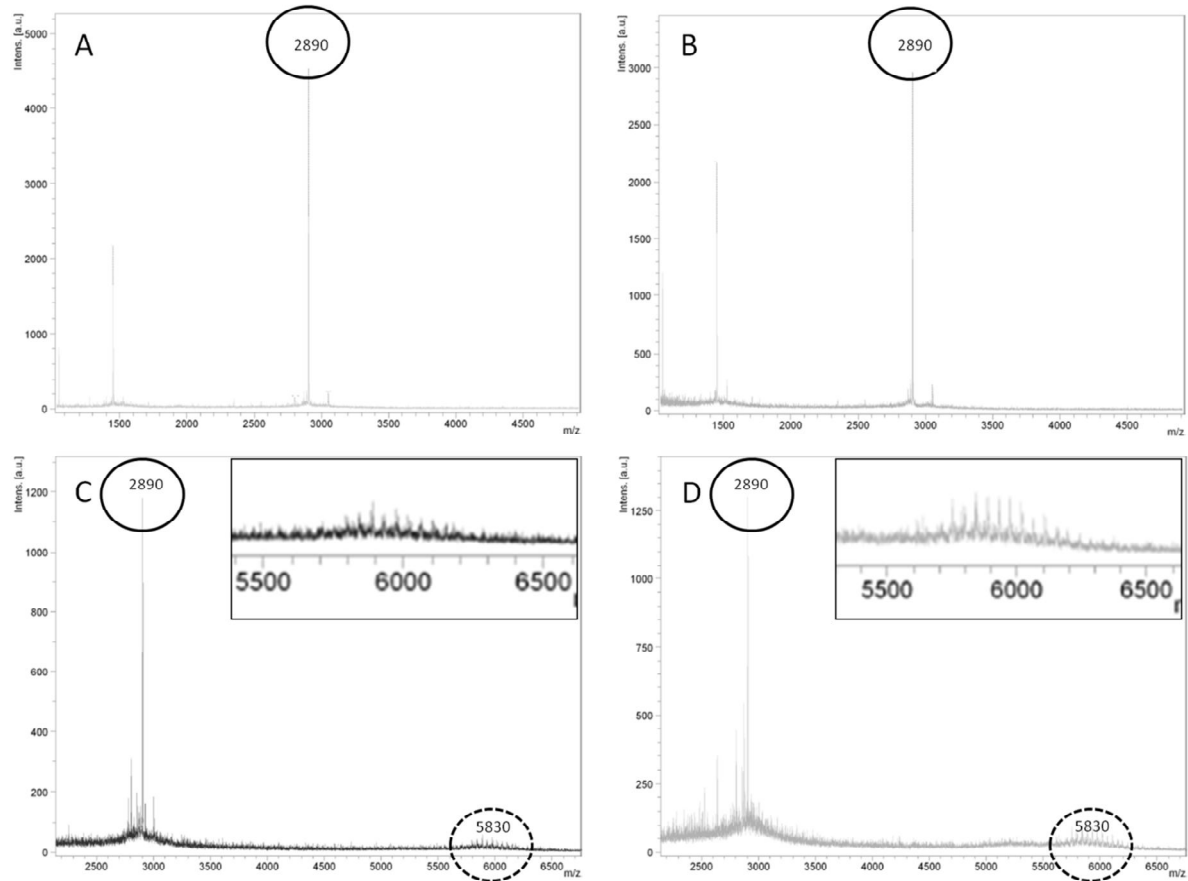

**Figure S1. MALDI mass spectroscopy of peptides and peptide amphiphiles. Both A) MCP-1 and B) scrambled peptides have a mass of 2890 g/mol. C/D) Conjugation with DSPE-PEG2000-maleimide shifts the mass of resulting MCP-1 and scrambled peptide amphiphiles to approximately 5830 g/mol.**

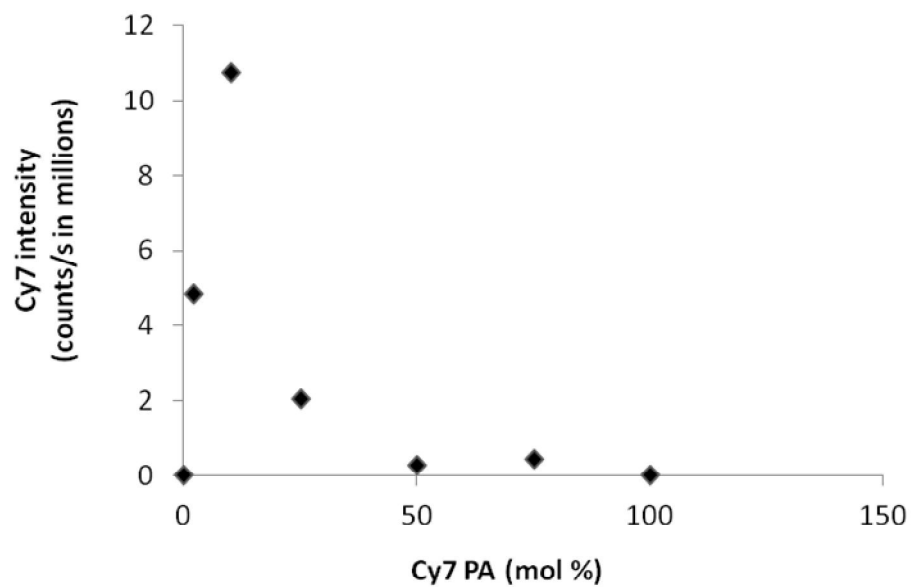

**Figure S2. Evaluation of fluorescence quenching of MCP-1 PAMs *in vitro*.** The molar content of DSPE-PEG(2000)-Cy7 within a micelle before fluorescence signal quenching occurred was determined to be 10% (100  $\mu$ M in PBS).

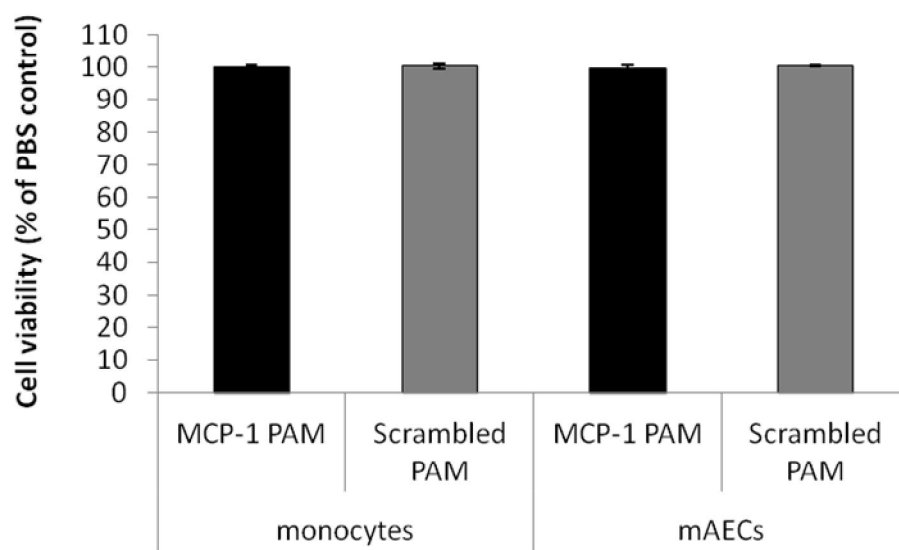

**Figure S3. Quantification of Live/Dead viability assay.** Data points are mean  $\pm$  SD and no statistical significance was found between all groups.

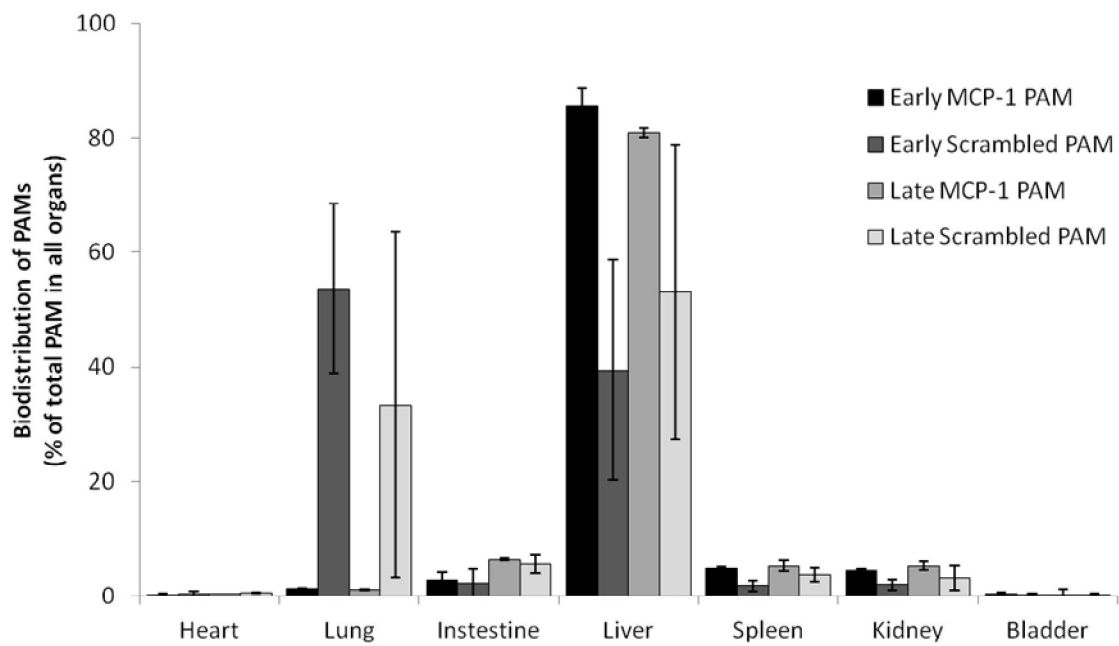

**Figure S4. Quantification of PAM biodistribution at 24 hours.** Note: Cy7-scrambled PAMs accumulate to a greater extent in the lungs vs. Cy7-MCP-1 PAMs, bladder measurement taken post-urine extraction, and data points are mean  $\pm$  SD.
